# Supplementary material for: Femtosecond laser induced robust periodic nanoripple structured mesh for highly efficient oil–water separation
Source: Royal Society of Chemistry journal article supplement (doi:10.1039/c7nr04582d), 2017-01-01
Supplement: c7nr04582d2.pdf [file c7nr04582d2.pdf]

## Supplementary information

# **Femtosecond laser induced robust periodic nanoripples structured mesh for highly efficient oil-water separation**

Kai Yin<sup>a,b</sup>, Dongkai Chu<sup>b</sup>, Xinran Dong<sup>b</sup>, Cong Wang<sup>b</sup>, Ji-An Duan<sup>\*b</sup>, and Jun He<sup>\*a</sup>

*<sup>a</sup>Hunan Key Laboratory of Super Microstructure and Ultrafast Process, School of Physics and Electronics,*

*Central South University, Changsha, 410083, China*

*<sup>b</sup>The State Key Laboratory of High Performance and Complex Manufacturing, College of Mechanical and*

*Electrical Engineering, Central South University, Changsha 410083, China*

\*To whom correspondence should be addressed.

\*Corresponding author: duanjian@csu.edu.cn, junhe@csu.edu.cn

Movie S1. The video exhibiting the oil-water separation process using the laser treated stainless steel mesh.

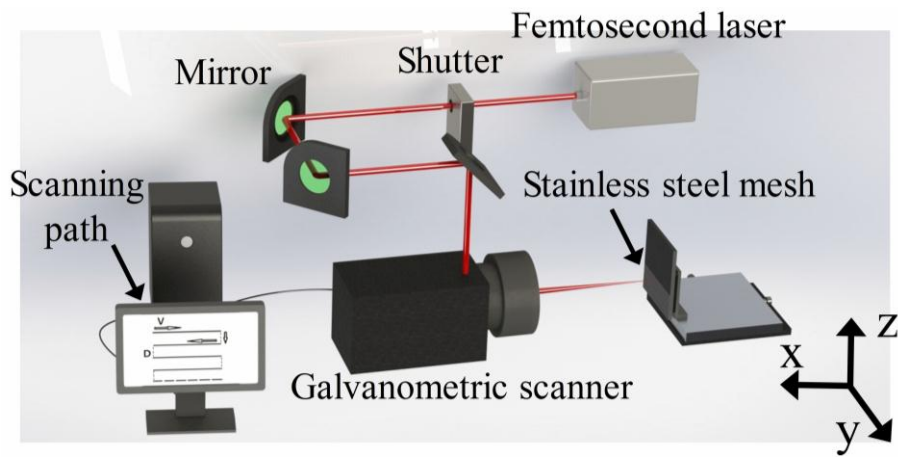

Fig. S1. Schematic of experiment setup

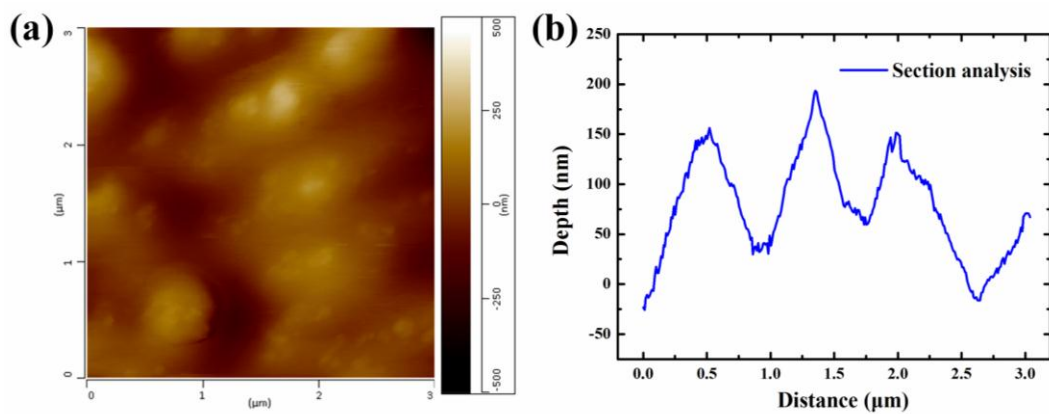

Fig. S2. AFM image of the laser treated mesh surface structures and its cross-section profile.

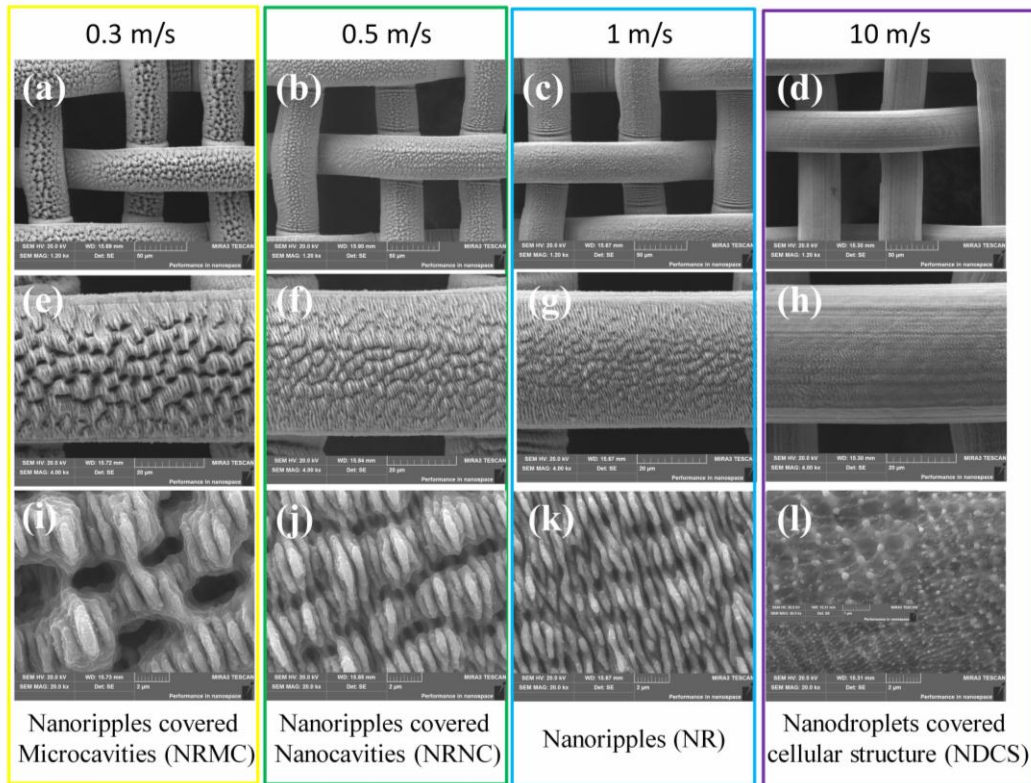

Fig. S3. SEM images of various femtosecond laser fabricated structures with different ablation parameters (scanning speed). The downsets are corresponding magnified SEM images. Laser power is fixed at 7W

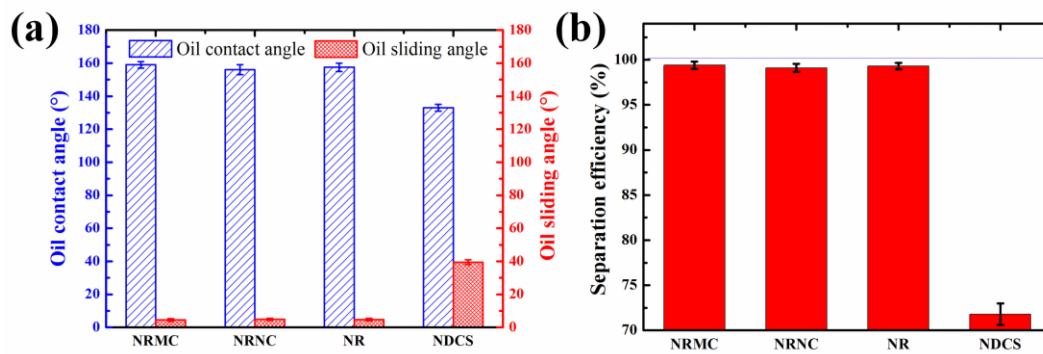

Fig. S4. (a) Contact angle and sliding angle of an oil droplet on various femtosecond laser fabricated structures in water. (b) Separation efficiency for the different femtosecond laser fabricated structures.

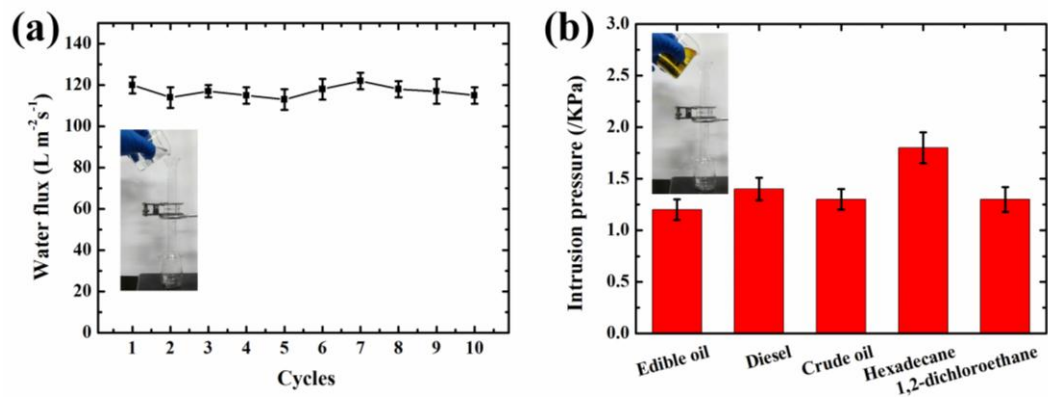

Fig. S5. (a) Water flux as a function of cycles. (b) Intrusion pressure as a function of various oils. (Water-sealed as-prepared mesh)
